# Supplementary material
Source: publisher site journal article supplement (https://www.dovepress.com/article/302545)
Supplement: Supplementary file 1 [file get_supplementary_file.php]

**Supplementary Table1.Surgical characteristics of patients**

| **Characteristics** | **All patients (n=239)** | **High-grade patterns (n=115)** | **Control (n=124)** | **P value** |
| --- | --- | --- | --- | --- |
| **T stage，n (%)** |  |  |  | 0.078 |
| pT1 | 136(56.9) | 60(52.2) | 76(55.9) |  |
| pT2 | 69(28.9) | 32(27.8) | 37(29.8) |  |
| pT3 | 18(7.5) | 11(9.6) | 7(5.6) |  |
| pT4 | 16(6.7) | 12(10.4) | 4(3.2) |  |
| **Nodal status，n (%)** |  |  |  | 0.779 |
| pN0 | 141(59.0) | 66(57.4) | 75(60.5) |  |
| pN1 | 35(14.6) | 17(14.8) | 18(14.5) |  |
| pN2 | 57(23.8) | 30(26.1) | 27(21.8) |  |
| pN3 | 6(2.5) | 2(1.7) | 4(3.2) |  |
| **Vascular spread，n (%)** |  |  |  | 0.257 |
| absent | 210(87.9) | 100(87.0) | 110(88.7） |  |
| present | 29(12.1) | 15(13.0) | 14(11.3) |  |
| **Pleural involvement, n (%)** |  |  |  | 0.411 |
| absent | 212(88.7) | 100(87.0) | 112(90.3) |  |
| present | 27(11.3) | 15(13.00) | 12(9.7) |  |

**Supplementary Table2. Patient characteristics treated with chemotherapy.**

| **Characteristic** | **All patients(n=108)** | **high-grade patterns(n=51)** | **control(n=57)** | **P value** |
| --- | --- | --- | --- | --- |
| **Age, n (%)** |  |  |  | 0.988 |
| >=70 | 17(15.7) | 8(15.7) | 9(15.8) |  |
| <70 | 91(84.3) | 43(84.3) | 48(84.2) |  |
| **Gender, n (%)** |  |  |  | 0.092 |
| Male | 74(68.5) | 39(76.5) | 35(61.4) |  |
| Female | 34(31.5) | 12(23.5) | 22(38.6) |  |
| **Smoke, n (%)** |  |  |  | 0.214 |
| Yes | 40(37.0) | 22(43.1) | 18(31.6) |  |
| No | 68(63.0) | 29(56.9) | 39(68.4) |  |
| **ECOG, n (%)** |  |  |  | 0.307 |
| 0-1 | 101(93.5) | 49(96.1) | 52(91.2) |  |
| 2 | 7(6.5) | 2(3.9) | 5(8.8) |  |
| **Tumor size, n (%)** |  |  |  | 0.659 |
| pT1 | 63(58.3) | 27(52.9) | 36(63.2) |  |
| pT2 | 30(27.8) | 15(29.4) | 15(26.3) |  |
| pT3 | 7(6.5) | 4(7.8) | 3(5.3) |  |
| pT4 | 8(7.4) | 5(9.8) | 3(5.3) |  |
| **Nodal status, n (%)** |  |  |  | 0.173 |
| pN0 | 62(57.4) | 30(58.8) | 32(56.1) |  |
| pN1 | 15(13.9) | 5(9.8) | 10(17.5) |  |
| pN2 | 28(25.9) | 16(31.4) | 12(21.1) |  |
| pN3 | 3(2.8) | 0(0) | 3(5.3) |  |
| **Vascular spread, n (%)** |  |  |  | 0.608 |
| absent | 97(89.8) | 45(88.2) | 52(91.2) |  |
| present | 11(10.2) | 6(11.8） | 5(8.8) |  |
| **Pleural involvement, n (%)** |  |  |  | 0.055 |
| absent | 99(91.7) | 44(86.3) | 55(96.5) |  |
| present | 9(8.3) | 7(13.7) | 2(3.5) |  |
| **Extra metastases, n (%)** |  |  |  | 0.929 |
| Yes | 25(23.1) | 12(23.5) | 13(22.8) |  |
| No | 83(76.9) | 39(76.5) | 44(77.2) |  |
| **Adjuvant chemotherapy, n (%)** |  |  |  | 0.708 |
| Yes | 55(51.9) | 25(49.0) | 30(52.6) |  |
| No | 53(49.1) | 26(51.0) | 27(47.4) |  |
| **Gene, n (%)** |  |  |  | 0.644 |
| KRAS | 18(16.7) | 11(21.6) | 7(12.3) |  |
| WT | 80(74.1) | 36(70.6) | 44(77.2) |  |
| NA | 7(6.5) | 3(5.9) | 4(7.0) |  |
| ERBB2 | 2(1.9) | 1(2.0) | 1(1.8) |  |
| BRAF | 1(0.9) | 0(0) | 1(1.8) |  |
| **First-line chemotherapy, n (%)** | |  |  | 0.567 |
| Platinum based chemotherapy | 100(92.6) | 48(94.1) | 52(91.2) |  |
| Else | 8(7.4) | 3(5.9) | 5(8.8) |  |
| **Stage, n (%)** |  |  |  | 0.170 |
| rIIIB | 14(13.0) | 9(17.6) | 5(8.8) |  |
| rIV | 94(87.0) | 42(82.4) | 52(91.2) |  |
| **Histological subtype, n (%)** |  |  |  | <0.001 |
| Lepidic predominant | 2(1.9) | 0(0) | 2(3.5) |  |
| Acinar predominant | 52(48.1) | 9(17.6) | 43(75.4) |  |
| Papillary predominant | 20(18.5) | 8(15.7) | 12(21.1) |  |
| Solid predominant | 29(26.9) | 29(56.9) | 0(0) |  |
| Micropapillary predominant | 5(4.6) | 5(9.8) | 0(0) |  |

**Supplementary Table3. Baseline characteristics of patients treated with EGFR-TKIs.**

| **Characteristic** | **All patients(n=131)** | **High-grade patterns(n=64)** | **control(n=67)** | **P value** |
| --- | --- | --- | --- | --- |
| **Age, n (%)** |  |  |  | 0.924 |
| >=70 | 25(19.1) | 12(18.8) | 13(19.4) |  |
| <70 | 106(80.9) | 52(81.3) | 54(80.6) |  |
| **Gender, n (%)** |  |  |  | 0.913 |
| Male | 60(45.8) | 29(45.3) | 31(46.3) |  |
| Female | 71(54.2) | 35(54.7) | 36(53.7) |  |
| **Smoke, n (%)** |  |  |  | 0.247 |
| Yes | 33(25.2) | 19(29.7) | 14(20.9) |  |
| No | 98(74.8) | 45(70.3) | 53(79.1) |  |
| **ECOG, n (%)** |  |  |  | 0.963 |
| 0-1 | 127(96.9) | 62(96.9) | 65(97.0) |  |
| 2 | 4(3.1) | 2(3.1) | 2(3.0) |  |
| **Tumor size，n (%)** |  |  |  | 0.087 |
| pT1 | 73(55.7) | 33(51.6) | 40(59.7) |  |
| pT2 | 39(29.8) | 17(26.6) | 22(32.8) |  |
| pT3 | 11(8.4) | 7(10.9) | 4(6.0) |  |
| pT4 | 8(6.1) | 7(10.9) | 1(1.5) |  |
| **Nodal status，n (%)** |  |  |  | 0.632 |
| pN0 | 79(60.3) | 36(56.3) | 43(64.2) |  |
| pN1 | 20(15.3) | 12(18.8) | 8(11.9) |  |
| pN2 | 29(22.1) | 14(21.9) | 15(22.4) |  |
| pN3 | 3(2.3) | 2(3.1) | 1(1.5) |  |
| **Vascular spread，n (%)** |  |  |  | 0.917 |
| absent | 113(86.3) | 55(85.9) | 58(86.6) |  |
| present | 18(13.7) | 9(14.1) | 9(13.4) |  |
| **Pleural involvement, n (%)** |  |  |  | 0.687 |
| absent | 113(86.3) | 56(87.5) | 57(85.1) |  |
| present | 18(13.7) | 8(12.5) | 10(14.9) |  |
| **Extra metastases, n (%)** |  |  |  | 0.926 |
| Yes | 67(51.1) | 33(51.6) | 34(50.7) |  |
| No | 64(48.9) | 31(48.4) | 33(49.3) |  |
| **EGFR mutation, n (%)** |  |  |  | 0.508 |
| EGFR 19DEL | 76(58.0) | 39(60.9) | 37(55.2) |  |
| EGFR L858R | 55(42.0) | 25(39.1) | 30(44.8) |  |
| **Targeted therapy, n (%)** |  |  |  | 0.558 |
| Gefitinib | 77(58.8) | 39(60.9) | 38(56.7) |  |
| Icotinib | 18(13.7) | 10(15.3) | 8(11.9) |  |
| Erlotinib | 36(27.5) | 15(23.4) | 21(31.3) |  |
| **Stage, n (%)** |  |  |  | 0.940 |
| rIIIB | 10(7.6) | 5(7.8) | 5(7.5) |  |
| rIV | 121(92.4) | 59(92.2) | 62(92..5) |  |
| **Histological subtype, n (%)** |  |  |  | P<0.001 |
| Acinar predominant | 63(48.1) | 25(39.1) | 38(56.7) |  |
| Papillary predominant | 38(29.0) | 9(14.1) | 29(43.3) |  |
| Solid predominant | 24(18.3) | 24(37.5) | 0(0) |  |
| Micropapillary predominant | 6(4.6) | 6(9.4) | 0(0) |  |
